# Supplementary material for: Peroxynitrite-Dependent Zinc Release and Inactivation of Guanosine 5′-Triphosphate Cyclohydrolase 1 Instigate Its Ubiquitination in Diabetes
Source: PubMed Central journal article supplement — Diabetes. 2013 Nov 16;62(12):4247–56. doi: 10.2337/db13-0751 (PMC3837037; doi:10.2337/db13-0751), 2013-11-16

## SUPPLEMENTARY DATA

**Materials.** Antibodies against ubiquitin and the GST-tag were obtained from Santa Cruz Biotechnology Inc. (Santa Cruz, CA). MG132 was purchased from BioMol (Plymouth Meeting, PA). UIM-agarose was obtained from Boston Biochem Inc. (Cambridge, MA). Glutathione (GSH) beads were from Amersham Pharmacia Biotech (Uppsala, Sweden). Full-length human GTPCH1 cDNA (GCH1) and lipofectamine 2000 were obtained from Invitrogen (Carlsbad, CA) and QuikChange site-directed mutagenesis kits were obtained from Stratagene (La Jolla, CA). The restriction enzymes *EcoRI* and *SaI* were from New England Biolabs (Ipswich, MA). Qiaquick DNA isolation kits were from Qiagen (Valencia, CA). The S-nitrosylation kits with the biotin-switch were from Cayman Chemicals (Ann Arbor, MI). All other chemicals, if not indicated, were purchased from Sigma-Aldrich.

**Assays of zinc release.** Release of zinc from GTPCH1 was measured by the 4-(2-pyridylazo)resorcinol (PAR) assay as described previously (1). All buffers used for the zinc assay were pretreated with Chelex 100 to remove background  $Zn^{2+}$ . To determine the total zinc content of untreated GTPCH1, maximal zinc release was determined by diluting GTPCH1 proteins in guanidine HCl (7 mol/L). The extinction coefficient for  $PAR_2Zn^{2+}$  was experimentally determined to be  $70\text{ mM}^{-1}\text{cm}^{-1}$  using a known concentration of zinc chloride.

**Immunoprecipitation and immunoblotting.** Cells were harvested and re-suspended in lysis buffer, and immunoprecipitated using anti-FLAG resin (Sigma). Western blotting was carried out using standard techniques with specific antibodies.

**In vitro pull-down assay.** Tetraubiquitin (Ub4) was used in binding assays (2) with GST-GTPCH1 or mutant immobilized on GSH beads. Ub4 chains were also used in FLAG-GTPCH1 pull-down assays with recombinant FLAG-GTPCH1 immobilized on anti-FLAG resin.

**Enrichments of ubiquitinated proteins.** Ubiquitinated proteins were enriched by ubiquitin affinity beads (UIM-agarose). These beads are conjugated to an ubiquitin-associated domain to facilitate their binding to ubiquitinated proteins. Cell lysates or tissue homogenates were incubated with UIM-agarose overnight at  $4^\circ\text{C}$ .

**Determination of GTPCH1 half-life assay.** Cultured cells were treated with cycloheximide (CHX,  $100\text{ }\mu\text{g/mL}$ ), and lysed at the indicated time points in the presence of CHX. Total proteins were subjected to analysis by Western blotting.

**Assays of the endothelium-dependent and -independent relaxation.** Aortic rings isolated from the treated mice were subjected to organ chamber assay of endothelium-dependent and -independent vasodilation as described previously (3,4).

**Detection of reactive oxygen species.** Intracellular  $O_2^-$  was assessed by the DHE fluorescence/HPLC assays, as described previously (3,4).

SUPPLEMENTARY DATA

**Supplementary Table 1.** Effects of Tempo on body weights and blood glucose in control and STZ-injected mice

|                    | Control    |            | STZ        |            |
|--------------------|------------|------------|------------|------------|
|                    | w/o Tempo  | with Tempo | w/o Tempo  | with Tempo |
| Body weight (g/dl) | 23.9 ± 0.2 | 23.3 ± 0.2 | 21.0 ± 0.6 | 20.9 ± 0.7 |
| Glucose (mg/dl)    | 153 ± 29   | 169 ± 25   | 523 ± 49   | 549 ± 46   |

**Supplementary Figure 1.** Representative chromatograms for HPLC measurement of GTPCH1 activity. A. Neopterin (Sigma, 1 μM) was used for standard for HPLC measurement of GTPCH1 activity. B. Buffer only as blank for negative control. C. GTPCH1 activity. 0.4 μM recombinant GTPCH1 plus 2 mM GTP was incubated in 37 °C for 2 hours. D. 0.4 μM recombinant GTPCH1 was pretreated 50 μM ONOO<sup>-</sup> on ice for 5 minutes and then plus 2 mM GTP was incubated in 37 °C for 2 hours.

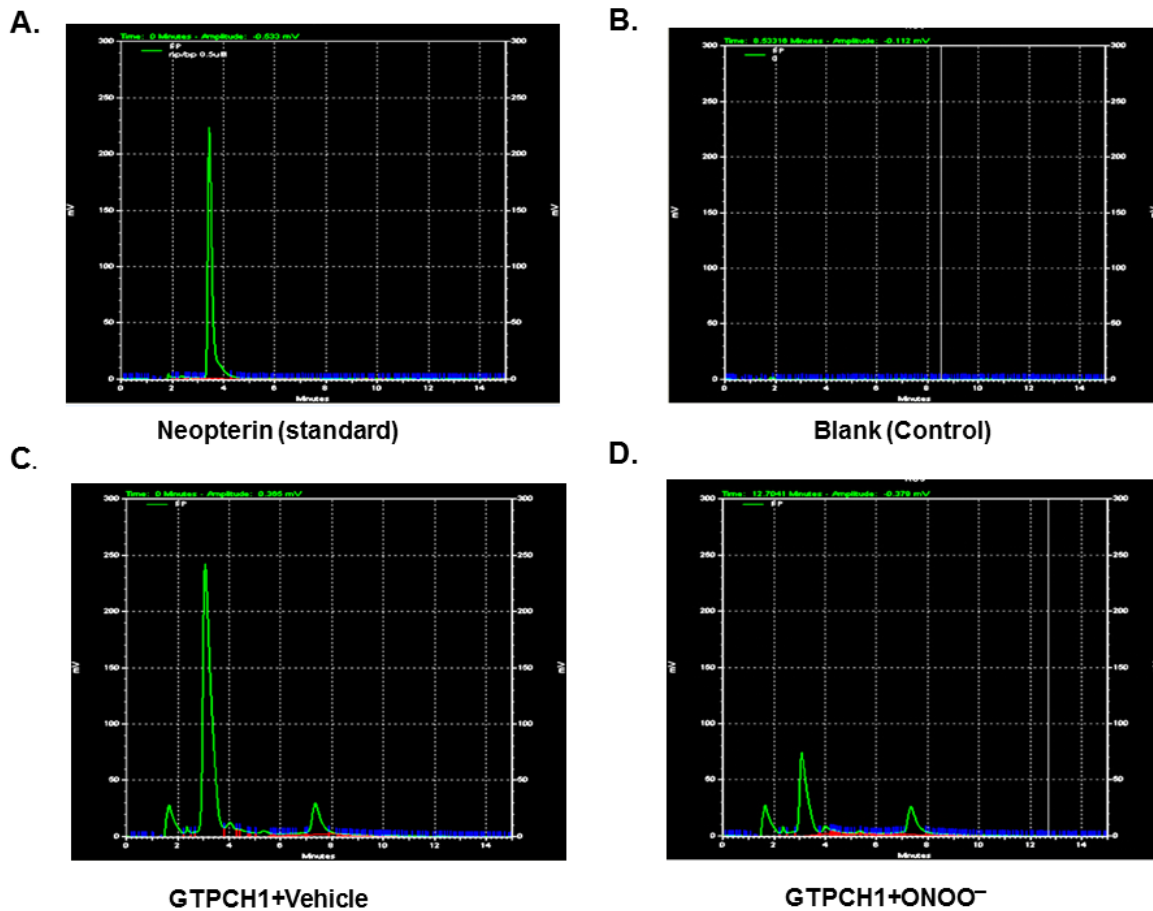

SUPPLEMENTARY DATA

**Supplementary Figure 2.** Representative chromatograms for HPLC measurement of superoxide production (2-hydroxyethidium and ethidium) in diabetes.

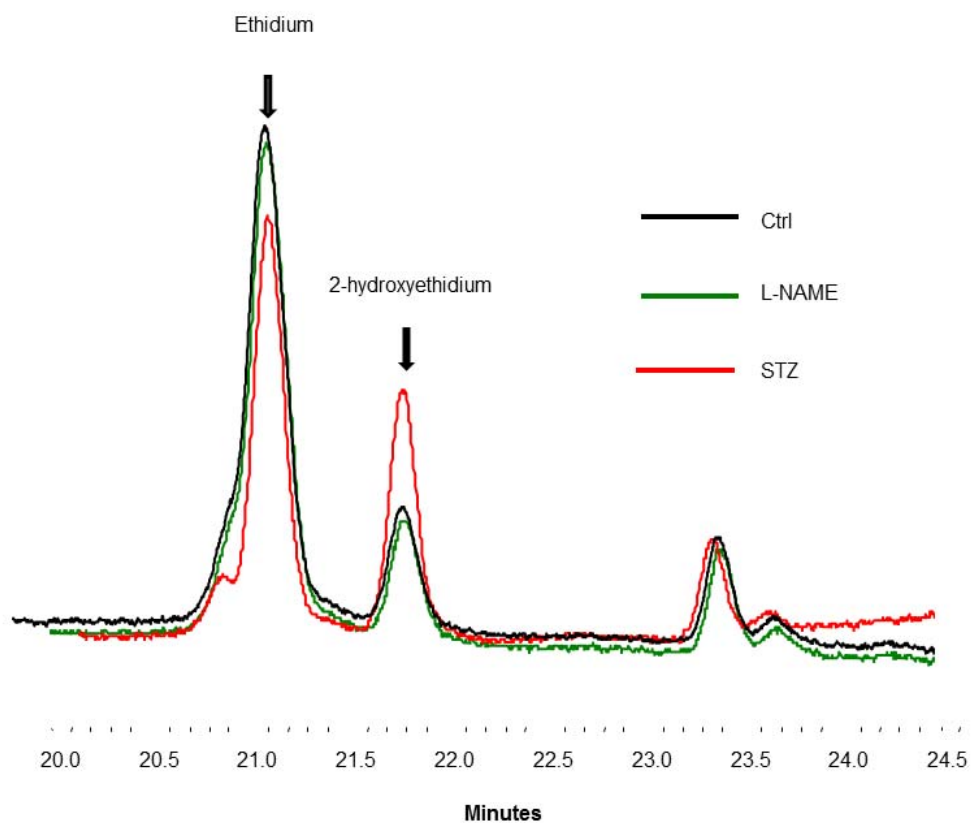

SUPPLEMENTARY DATA

**Supplementary Figure 3.** ONOO<sup>-</sup>-induced GTPCH1 modification and ubiquitination in diabetic mouse hearts *in vivo*. Control and STZ-induced diabetic mice were given Tempo as described in Experimental Procedures. Mouse hearts from control and diabetic mice were isolated and assayed for **A** (right panel) to **E**. **A**, 3-NT-positive proteins; **B**, GTPCH1 activity; **C,D,E**, Effects of Tempol on GTPCH1 and ubiquitinated GTPCH1 in isolated mouse aortas from non-diabetic and diabetic mice *in vivo*. The blot is a representative of three blots obtained from 5 mice. Results were obtained from five mice. \**P*<0.05 vs. control. #*P*<0.05 vs. STZ. NS indicates *P*>0.05 vs. control.

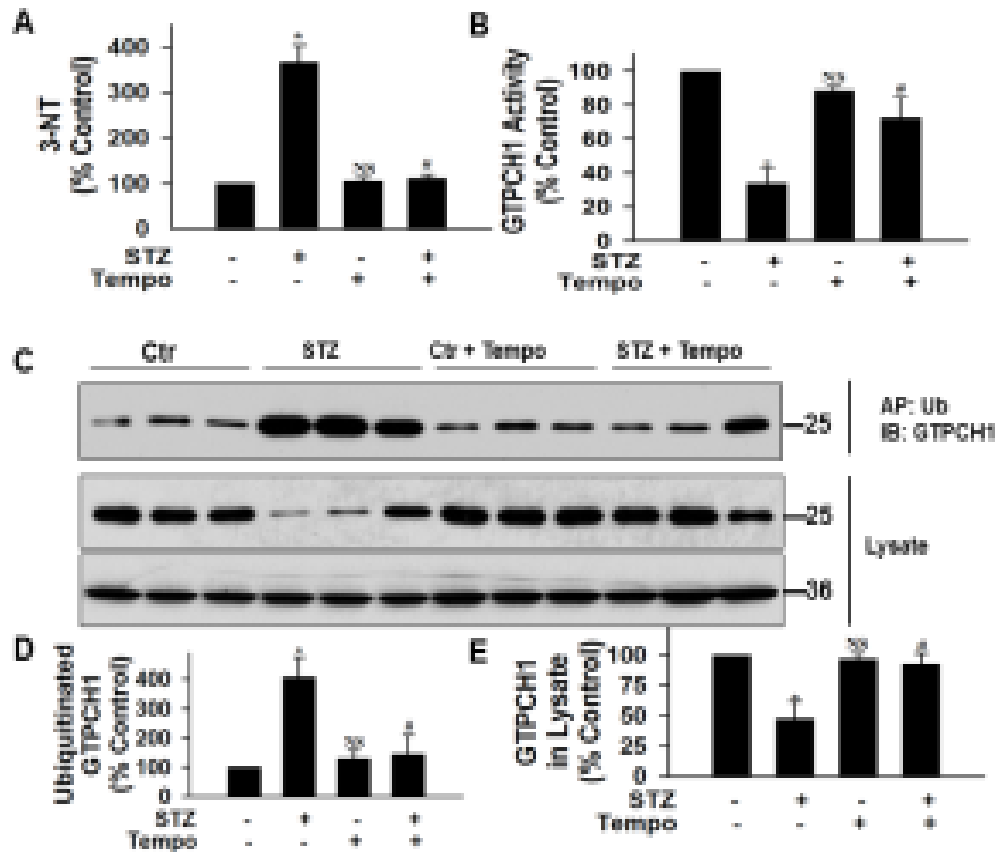

Supplement: supp_db13-0751_DB130751SupplementaryData.pdf [file supp_db13-0751_DB130751SupplementaryData.pdf]
